# Supplementary material
Source: publisher site journal article supplement (https://www.dovepress.com/article/supplementary_file/584601/584601_Supplementary%20Material.xlsx)
Supplement: Supplementary file 1 [file 584601_Supplementary%20Material.xlsx]

## Sheet: Table S1
Table S1. MASLD Risk Calculator for PLWH Based on Cox Model
Predictors	Input Value	Notes
ALT	19	U/L
Serum amylase	105	U/L
UA	466.1	μmol/L
TG	2.96	mmol/L
HDL	1.16	mmol/L
PIs-based	0	1 = yes, 0 = no
INSTIs-based	1	1 = yes, 0 = no
CD4 T lymphocyte count	323	cells/μL
CD8 T lymphocyte count	2085	cells/μL
Results:
Linear Predictor (LP)		0.187638
1-Year MASLD Risk		0.0301392
3-Year MASLD Risk		0.107517
5-Year MASLD Risk		0.189793
